# Supplementary material for: Electroencephalography microstates as novel functional biomarkers for insomnia disorder
Source: PubMed Central journal article supplement — Gen Psychiatr. 2023 Dec 22;36(6):e101171. doi: 10.1136/gpsych-2023-101171 (PMC10749048; doi:10.1136/gpsych-2023-101171), 2023-12-22
Supplement: gpsych-2023-101171supp001.pdf [file gpsych-2023-101171supp001.pdf]

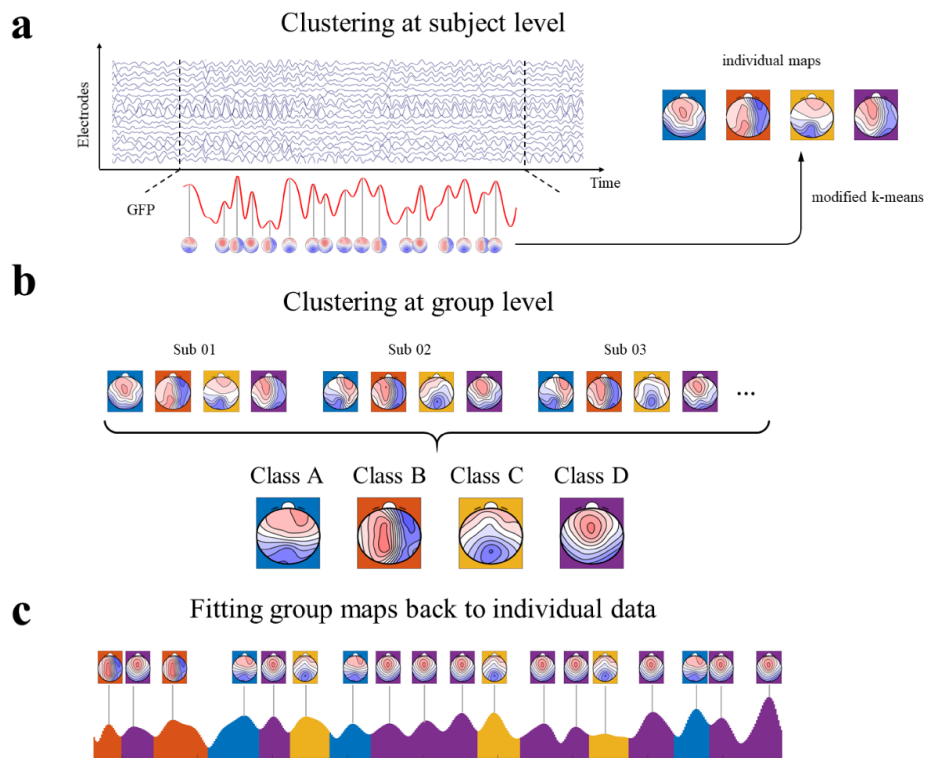

**Supplementary Figure 1**

**Microstate analysis process.** **a.** For each subject, data at global maxima of the global field power are clustered using the modified k-means algorithm to obtain individual microstate maps. **b.** The individual maps are combined to obtain group maps within each group using group-level clusters. **c.** Group maps are fit back to the data at global field power peaks assigning each global field power peak to the microstate class with the highest topographical correlation.

### Differences in sleep quality between ID patients and GSC at baseline

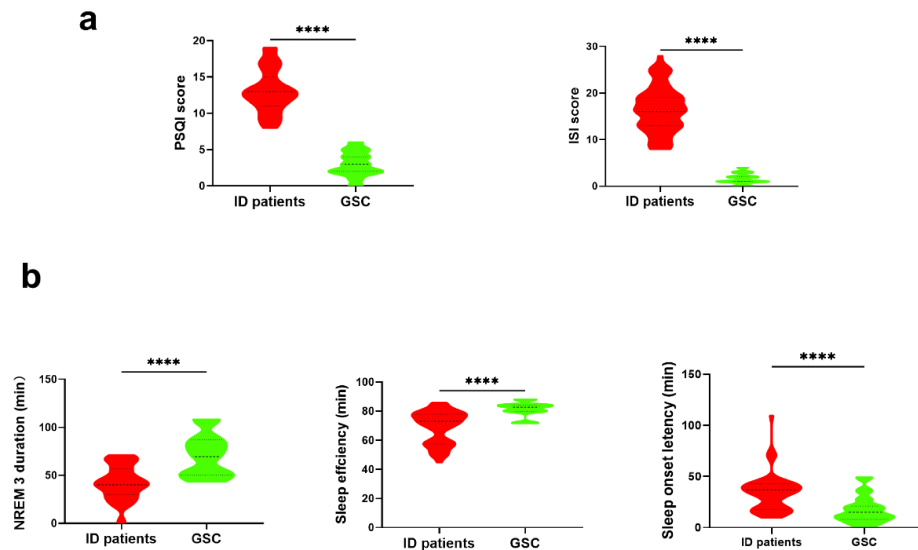

**Supplementary Figure 2**

#### Differences in sleep quality between insomnia disorder patients and good sleep controls at baseline.

Polysomnography data from two participants in the good sleep controls group were excluded from the analysis due to poor data quality. **a.** Differences in subjective sleep quality (PSQI, ISI) between insomnia disorder patients and good sleep controls at baseline. **b.** Differences in objective sleep quality (non-rapid eye movement sleep stage 3 duration, sleep efficiency, sleep onset latency) between insomnia disorder patients and good sleep controls at baseline. *Note:* ns = not significant, \* $P < 0.05$ , \*\* $P < 0.01$ , \*\*\* $P < 0.001$ , \*\*\*\* $P < 0.0001$ ; ID, insomnia disorder; GSC, good sleep controls; PSQI, Pittsburgh Sleep Quality Index; ISI, Insomnia Severity Index; NREM, non-rapid eye movement.

**Table S1. Demographic and behavioural measures.**

| Variable | ID patients (N = 60) | GSC (N = 40)   | Statistics |         |
|----------|----------------------|----------------|------------|---------|
|          | Mean (SD)            | Mean (SD)      | t-test     | p value |
| Age      | 48.886 (11.795)      | 43.378 (7.414) | -2.635     | 0.010   |
| PSQI     | 13.958 (2.790)       | 3.162 (1.500)  | -22.861    | <0.001  |
| ISI      | 16.125 (4.867)       | 1.702 (1.102)  | -19.880    | <0.001  |
| ESS      | 7.979 (4.953)        | 5.649 (3.441)  | -2.556     | 0.012   |
| BDI      | 14.125 (8.122)       | 4.338 (4.053)  | -7.258     | <0.001  |
| BAI      | 35.105 (7.299)       | 26.212 (2.051) | -8.040     | <0.001  |
| MoCA     | 26.500 (4.01)        | 28.054 (3.018) | 1.968      | 0.052   |
| MMSE     | 27.542 (2.32)        | 29.297 (1.175) | 4.535      | <0.001  |

Note: ID, insomnia disorder; GSC, good sleep controls; SD, Standard Deviation.

**Table S2. Demographic and behavioural measures.**

| Variable | ID patients (N = 86, male/female = 42/44) |
|----------|-------------------------------------------|
|          | Mean (SD)                                 |
| Age      | 47.5 (11.35)                              |
| PSQI     | 12.95 (3.50)                              |

Note: PSQI, Pittsburgh Sleep Quality Index; ID, insomnia disorder; SD, Standard Deviation.

**Table S3. Comparison of electroencephalography microstate temporal parameters between the good sleep controls group and insomnia disorder group.**

|                             | Microstate class | ID patients<br>(n = 48) | GSC<br>(n = 37) | Statistics |         |                  |
|-----------------------------|------------------|-------------------------|-----------------|------------|---------|------------------|
|                             |                  | Mean (SD)               | Mean (SD)       | t-test     | p value | P <sub>FDR</sub> |
| <b>Duration (s)</b>         | A                | 0.075 (0.011)           | 0.073 (0.013)   | -1.083     | 0.282   | 0.676            |
|                             | B                | 0.064 (0.010)           | 0.063 (0.007)   | -0.121     | 0.904   | 0.986            |
|                             | C                | 0.067 (0.011)           | 0.067 (0.011)   | -0.045     | 0.964   | 0.964            |
|                             | D                | 0.069 (0.012)           | 0.070 (0.012)   | 0.446      | 0.657   | 0.985            |
| <b>Occurrence (times/s)</b> | A                | 4.116 (0.538)           | 3.979 (0.771)   | -0.962     | 0.339   | 0.581            |
|                             | B                | 3.056 (0.812)           | 3.131 (0.864)   | 0.414      | 0.680   | 0.906            |
|                             | C                | 3.669 (0.697)           | 3.457 (0.806)   | -1.303     | 0.196   | 0.589            |
|                             | D                | 3.606 (0.840)           | 4.057 (0.540)   | 2.999      | 0.004   | <b>0.021</b>     |
| <b>Contribution (%)</b>     | A                | 0.310 (0.051)           | 0.282 (0.070)   | -1.605     | 0.040   | 0.160            |
|                             | B                | 0.197 (0.062)           | 0.193 (0.059)   | 0.325      | 0.948   | 1.034            |
|                             | C                | 0.246 (0.062)           | 0.227 (0.066)   | -0.981     | 0.198   | 0.396            |
|                             | D                | 0.241 (0.070)           | 0.296 (0.060)   | 3.798      | 0.0003  | <b>0.003</b>     |

Note: ID, insomnia disorder; GSC, good sleeper controls; SD, Standard Deviation.

**Table S4. Specific performance of each fold of the efficacy prediction mode.**

|                | Accuracy | Precision | Recall | F1-score | AUC  |
|----------------|----------|-----------|--------|----------|------|
| <b>Fold-1</b>  | 0.78     | 0.84      | 0.78   | 0.76     | 0.80 |
| <b>Fold-2</b>  | 1.00     | 1.00      | 1.00   | 1.00     | 1.00 |
| <b>Fold-3</b>  | 0.78     | 0.85      | 0.78   | 0.77     | 0.75 |
| <b>Fold-4</b>  | 0.78     | 0.78      | 0.78   | 0.78     | 0.80 |
| <b>Fold-5</b>  | 0.78     | 0.84      | 0.78   | 0.76     | 0.85 |
| <b>Fold-6</b>  | 0.78     | 0.84      | 0.78   | 0.76     | 0.80 |
| <b>Fold-7</b>  | 0.75     | 0.75      | 0.75   | 0.75     | 0.81 |
| <b>Fold-8</b>  | 0.75     | 0.83      | 0.75   | 0.73     | 0.69 |
| <b>Fold-9</b>  | 1.00     | 1.00      | 1.00   | 1.00     | 1.00 |
| <b>Fold-10</b> | 0.63     | 0.63      | 0.62   | 0.62     | 0.81 |
| <b>Average</b> | 0.80     | 0.83      | 0.80   | 0.79     | 0.83 |

*Note:* AUC, Area Under the Curve.
